# Supplementary material
Source: PubMed Central journal article supplement (PMC2720064)
Supplement: NIHMS30871-supplement-01.pdf [file NIHMS30871-supplement-01.pdf]

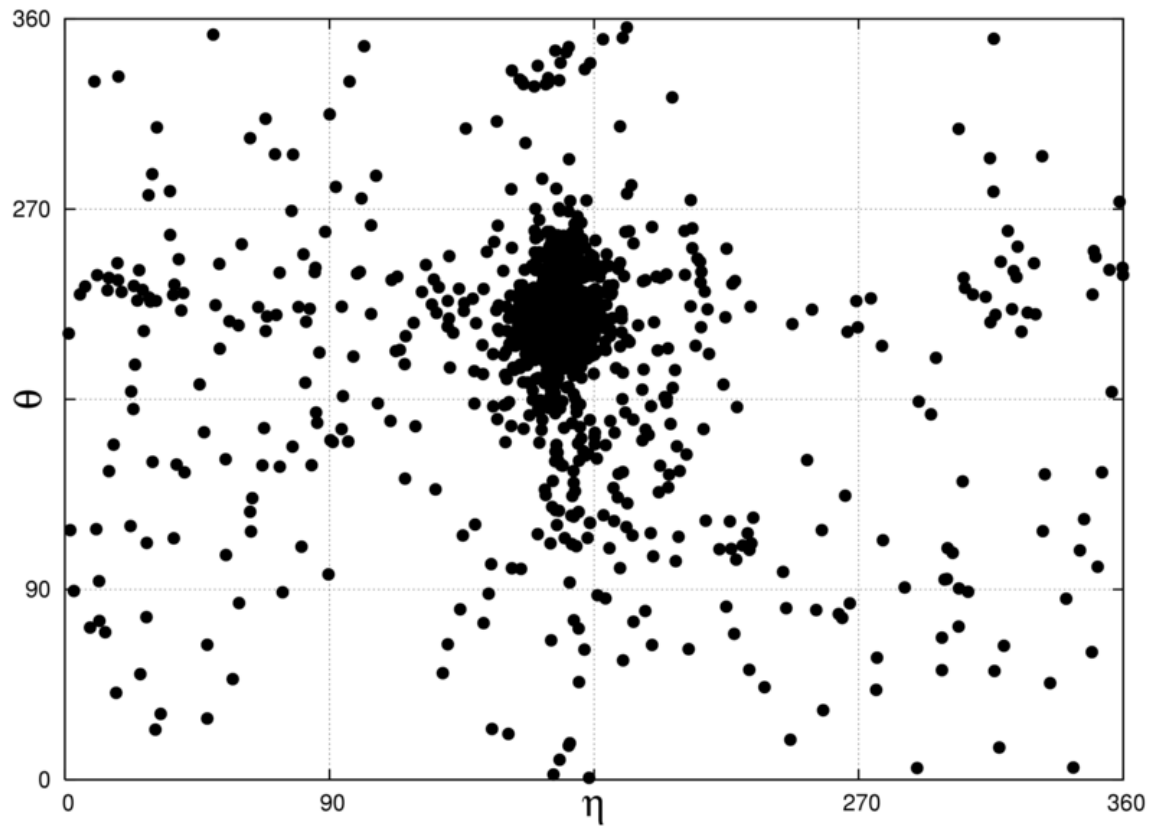

**Supplementary Figure 1:** An  $\eta$ - $\theta$  plot of a 4.5 Å structure of the 30S ribosomal subunit from *T. thermophilus* (PDB file 1I95). The plot looks remarkably similar to a typical  $\eta$ - $\theta$  plot at better resolution, indicating that errors in  $\eta$ - $\theta$  values are small in structures with medium-low resolution.
