# Supplementary material
Source: PubMed Central journal article supplement (PMC2720064)
Supplement: NIHMS30871-supplement-02.pdf [file NIHMS30871-supplement-02.pdf]

| <b>PDB Code</b> | <b>Description from PDB file</b>                                                                                                                                      |
|-----------------|-----------------------------------------------------------------------------------------------------------------------------------------------------------------------|
| <b>1A9N</b>     | U2 B <sup>1</sup> /A <sup>1</sup> /RNA TERNARY COMPLEX                                                                                                                |
| <b>1B23</b>     | E. COLI CYSTEINYL-TRNA AND T. AQUATICUS ELONGATION FACTOR EF-TU:GTP TERNARY COMPLEX                                                                                   |
| <b>1B7F</b>     | SXL-LETHAL PROTEIN/RNA COMPLEX                                                                                                                                        |
| <b>1BR3</b>     | CRYSTAL STRUCTURE OF AN 82-NUCLEOTIDE RNA-DNA COMPLEX FORMED BY THE 10-23 DNA ENZYME                                                                                  |
| <b>1C9S</b>     | CRYSTAL STRUCTURE OF A COMPLEX OF TRP RNA-BINDING ATTENUATION PROTEIN WITH A 53-BASE SINGLE STRANDED RNA CONTAINING ELEVEN GAG TRIPLETS SEPARATED BY AU DINUCLEOTIDES |
| <b>1CSL</b>     | CRYSTAL STRUCTURE OF THE RRE HIGH AFFINITY SITE                                                                                                                       |
| <b>1CVJ</b>     | X-RAY CRYSTAL STRUCTURE OF THE POLY(A)-BINDING PROTEIN IN COMPLEX WITH POLYADENYLATE RNA                                                                              |
| <b>1CX0</b>     | HEPATITIS DELTA VIRUS RIBOZYME                                                                                                                                        |
| <b>1DDL</b>     | DESMODIUM YELLOW MOTTLE TYMOVIRUS                                                                                                                                     |
| <b>1DUH</b>     | CRYSTAL STRUCTURE OF THE CONSERVED DOMAIN IV OF E. COLI 4.5S RNA                                                                                                      |
| <b>1E7K</b>     | CRYSTAL STRUCTURE OF THE SPLICEOSOMAL 15.5KD PROTEIN BOUND TO A U4 SNRNA FRAGMENT                                                                                     |
| <b>1EC6</b>     | CRYSTAL STRUCTURE OF NOVA-2 KH3 K-HOMOLOGY RNA-BINDING DOMAIN BOUND TO 20-MER RNA HAIRPIN                                                                             |
| <b>1EHZ</b>     | THE CRYSTAL STRUCTURE OF YEAST PHENYLALANINE TRNA AT 1.93 A RESOLUTION                                                                                                |
| <b>1ET4</b>     | CRYSTAL STRUCTURE OF A VITAMIN B12 BINDING RNA APTAMER WITH LIGAND AT 2.3 A                                                                                           |
| <b>1F1T</b>     | CRYSTAL STRUCTURE OF THE MALACHITE GREEN APTAMER COMPLEXED WITH TETRAMETHYL-ROSAMINE                                                                                  |
| <b>1F27</b>     | CRYSTAL STRUCTURE OF A BIOTIN-BINDING RNA PSEUDOKNOT                                                                                                                  |
| <b>1F7U</b>     | CRYSTAL STRUCTURE OF THE ARGINYL-TRNA SYNTHETASE COMPLEXED WITH THE TRNA(ARG) AND L-ARG                                                                               |
| <b>1F7Y</b>     | THE CRYSTAL STRUCTURE OF TWO UUCG LOOPS HIGHLIGHTS THE ROLE PLAYED BY 2'-HYDROXYL GROUPS IN ITS UNUSUAL STABILITY                                                     |
| <b>1F8V</b>     | THE STRUCTURE OF PARIACOTO VIRUS REVEALS A DODECAHEDRAL CAGE OF DUPLEX RNA                                                                                            |
| <b>1FFY</b>     | INSIGHTS INTO EDITING FROM AN ILE-TRNA SYNTHETASE STRUCTURE WITH TRNA(ILE) AND MUPIROCIN                                                                              |
| <b>1H3E</b>     | TYROSYL-TRNA SYNTHETASE FROM THERMUS THERMOPHILUS COMPLEXED WITH WILD-TYPE TRNATYR(GUA) AND WITH ATP AND TYROSINOL                                                    |
| <b>1H4S</b>     | PROLYL-TRNA SYNTHETASE FROM THERMUS THERMOPHILUS COMPLEXED WITH TRNAPRO(CGG) AND A PROLYL-ADENYLATE ANALOGUE                                                          |
| <b>1HMH</b>     | HAMMERHEAD RNA/DNA/COMPLEX                                                                                                                                            |
| <b>1HR2</b>     | CRYSTAL STRUCTURE ANALYSIS OF A MUTANT P4-P6 DOMAIN (DEL209) OF TETRAHYMENA THEMOPHILA GROUP I INTRON.                                                                |
| <b>1I6U</b>     | RNA-PROTEIN INTERACTIONS: THE CRYSTAL STRUCTURE OF RIBOSOMAL PROTEIN S8/RRNA COMPLEX FROM METHANOCOCCUS JANNASCHII                                                    |
| <b>1IVS</b>     | CRYSTAL STRUCTURE OF THERMUS THERMOPHILUS VALYL-TRNA SYNTHETASE COMPLEXED WITH TRNA(VAL) AND VALYL-ADENYLATE ANALOGUE                                                 |
| <b>1JBR</b>     | CRYSTAL STRUCTURE OF THE RIBOTOXIN RESTRICTOCIN AND A 31-MER SRD RNA INHIBITOR                                                                                        |
| <b>1K8W</b>     | CRYSTAL STRUCTURE OF THE E. COLI PSEUDOURIDINE SYNTHASE                                                                                                               |

TRUB BOUND TO A T STEM-LOOP RNA

**1KH6** CRYSTAL STRUCTURE OF AN RNA TERTIARY DOMAIN ESSENTIAL TO HCV IRES-MEDIATED TRANSLATION INITIATION.

**1KQ2** CRYSTAL STRUCTURE OF AN HFQ-RNA COMPLEX

**1KXK** CRYSTAL STRUCTURE OF A RNA MOLECULE CONTAINING DOMAIN 5 AND 6 OF THE YEAST A15G GROUP II SELF-SPLICING INTRON

**1L2X** ATOMIC RESOLUTION CRYSTAL STRUCTURE OF A VIRAL RNA PSEUDOKNOT

**1L9A** CRYSTAL STRUCTURE OF SRP19 IN COMPLEX WITH THE S DOMAIN OF SIGNAL RECOGNITION PARTICLE RNA

**1LNG** CRYSTAL STRUCTURE OF THE SRP19-7S.S SRP RNA COMPLEX OF M. JANNASCHII

**1M5K** CRYSTAL STRUCTURE OF A HAIRPIN RIBOZYME IN THE CATALYTICALLY-ACTIVE CONFORMATION

**1M8V** STRUCTURE OF PYROCOCCLUS ABYSSII SM PROTEIN IN COMPLEX WITH A URIDINE HEPTAMER

**1M8X** CRYSTAL STRUCTURE OF THE PUMILIO-HOMOLOGY DOMAIN FROM HUMAN PUMILIO1 IN COMPLEX WITH NRE1-14 RNA

**1MZP** STRUCTURE OF THE L1 PROTUBERANCE IN THE RIBOSOME

**1N78** CRYSTAL STRUCTURE OF THERMUS THERMOPHILUS GLUTAMYL-TRNA SYNTHETASE COMPLEXED WITH TRNA(GLU) AND GLUTAMOL-AMP.

**1NTB** 2.9 Å CRYSTAL STRUCTURE OF STREPTOMYCIN RNA-APTAMER COMPLEX

**1OOA** CRYSTAL STRUCTURE OF NF-KB(P50)<sub>2</sub> COMPLEXED TO A HIGH-AFFINITY RNA APTAMER

**1Q2R** CHEMICAL TRAPPING AND CRYSTAL STRUCTURE OF A CATALYTIC TRNA GUANINE TRANSGLYCOSYLASE COVALENT INTERMEDIATE

**1QF6** STRUCTURE OF E. COLI THREONYL-TRNA SYNTHETASE COMPLEXED WITH ITS COGNATE TRNA

**1QTQ** GLUTAMINYL-TRNA SYNTHETASE COMPLEXED WITH TRNA AND AN AMINO ACID ANALOG

**1R3E** CRYSTAL STRUCTURE OF TRNA PSEUDOURIDINE SYNTHASE TRUB AND ITS RNA COMPLEX: RNA-PROTEIN RECOGNITION THROUGH A COMBINATION OF RIGID DOCKING AND INDUCED FIT

**1R3O** CRYSTAL STRUCTURE OF THE FIRST RNA DUPLEX IN L-CONFORMATION AT 1.9Å RESOLUTION

**1RLG** MOLECULAR BASIS OF BOX C/D RNA-PROTEIN INTERACTION: CO-CRYSTAL STRUCTURE OF THE ARCHAEL SRNP INITIATION COMPLEX

**1S03** THE STRUCTURE OF A RIBOSOMAL PROTEIN S8/SPC OPERON MRNA COMPLEX

**1S72** REFINED CRYSTAL STRUCTURE OF THE HALOARCUA MARISMORTUI LARGE RIBOSOMAL SUBUNIT AT 2.4 ÅNGSTROM RESOLUTION

**1SDS** STRUCTURE OF PROTEIN L7AE BOUND TO A K-TURN DERIVED FROM AN ARCHAEL BOX H/ACA SRNA

**1U8D** GUANINE RIBOSWITCH BOUND TO HYPOXANTHINE

**1U9S** CRYSTAL STRUCTURE OF THE SPECIFICITY DOMAIN OF RIBONUCLEASE P OF THE A-TYPE

**1VFG** CRYSTAL STRUCTURE OF TRNA NUCLEOTIDYLTRANSFERASE COMPLEXED WITH A PRIMER TRNA AND AN INCOMING ATP ANALOG

**1WPU** CRYSTAL STRUCTURE OF THE HUTP ANTITERMINATION COMPLEX BOUND TO A SINGLE STRANDED REGION OF HUT MRNA

**1XJR** THE STRUCTURE OF A RIGOROUSLY CONSERVED RNA ELEMENT WITHIN THE SARS VIRUS GENOME

|             |                                                                                                                                                                                    |
|-------------|------------------------------------------------------------------------------------------------------------------------------------------------------------------------------------|
| <b>1XMQ</b> | CRYSTAL STRUCTURE OF T6A37-ASLLYSUUU AAA-MRNA BOUND TO THE DECODING CENTER                                                                                                         |
| <b>1XOK</b> | CRYSTAL STRUCTURE OF ALFALFA MOSAIC VIRUS RNA 3'UTR IN COMPLEX WITH COAT PROTEIN N TERMINAL PEPTIDE                                                                                |
| <b>1Y3S</b> | HIV-1 DIS RNA SUBTYPE F- MPD FORM                                                                                                                                                  |
| <b>1YFG</b> | YEAST INITIATOR TRNA                                                                                                                                                               |
| <b>1YLS</b> | CRYSTAL STRUCTURE OF SELENIUM-MODIFIED DIELS-ALDER RIBOZYME COMPLEXED WITH THE PRODUCT OF THE REACTION BETWEEN N-PENTYLMALEIMIDE AND COVALENTLY ATTACHED 9-HYDROXYMETHYLANTHRACENE |
| <b>1Z43</b> | CRYSTAL STRUCTURE OF 7S.S SRP RNA OF M. JANNASCHII                                                                                                                                 |
| <b>2A43</b> | CRYSTAL STRUCTURE OF A LUTEOVIRAL RNA PSEUDOKNOT AND MODEL FOR A MINIMAL RIBOSOMAL FRAMESHIFTING MOTIF                                                                             |
| <b>2A8V</b> | RHO TRANSCRIPTION TERMINATION FACTOR/RNA COMPLEX                                                                                                                                   |
| <b>2ATW</b> | STRUCTURE OF A MYCOBACTERIUM TUBERCULOSIS NUSA-RNA COMPLEX                                                                                                                         |
| <b>2BH2</b> | CRYSTAL STRUCTURE OF E. COLI 5-METHYLURIDINE METHYLTRANSFERASE RUMA IN COMPLEX WITH RIBOSOMAL RNA SUBSTRATE AND S-ADENOSYLHOMOCYSTEINE.                                            |
| <b>2BTE</b> | THERMUS THERMOPHILUS LEUCYL-TRNA SYNTHETASE COMPLEXED WITH WITH A TRNALEU TRANSCRIPT IN THE POST-EDITING CONFORMATION AND A POST-TRANSFER EDITING SUBSTRATE ANALOGUE               |
| <b>2BU1</b> | MS2-RNA HAIRPIN (5BRU-5) COMPLEX                                                                                                                                                   |
| <b>2BX2</b> | CATALYTIC DOMAIN OF E. COLI RNASE E                                                                                                                                                |
| <b>2CSX</b> | CRYSTAL STRUCTURE OF AQUIFEX AEOLICUS METHIONYL-TRNA SYNTHETASE COMPLEXED WITH TRNA(MET)                                                                                           |
| <b>2FMT</b> | METHIONYL-TRNAFMET FORMYLTRANSFERASE COMPLEXED WITH FORMYL-METHIONYL-TRNAFMET                                                                                                      |
| <b>361D</b> | CRYSTAL STRUCTURE OF DOMAIN E OF THERMUS FLAVUS 5S RRNA: A HELICAL RNA-STRUCTURE INCLUDING A TETRALOOP                                                                             |
| <b>397D</b> | A 1.3 Å RESOLUTION CRYSTAL STRUCTURE OF THE HIV-1 TRANS-ACTIVATION RESPONSE REGION RNA STEM REVEALS A METAL ION-DEPENDENT BULGE CONFORMATION                                       |
| <b>7MSF</b> | F7 APTAMER MS2 COAT PROTEIN COMPLEX                                                                                                                                                |

**Supplementary Table 1:** The PDB files used for the cluster analysis. Redundant structures and chains were eliminated with the aid of the automated tool described in Wadley & Pyle, 2004.
